# Supplementary material for: Efficient yolk-shelled Fe–N–C oxygen reduction electrocatalyst via N-rich molecular-guided pyrolysis
Source: Royal Society of Chemistry journal article supplement (doi:10.1039/d3nr03889k), 2023-01-01
Supplement: d3nr03889k1.pdf [file d3nr03889k1.pdf]

## Supporting Information

### Efficient Yolk-shelled Fe-N-C Oxygen Reduction Electrocatalyst via N-rich Molecular Guiding Pyrolysis

Qingxue Lai,<sup>1\*</sup> Hongmei Zheng,<sup>1</sup> Wanying Zhang,<sup>1</sup> Yi Sheng,<sup>1</sup> Luanjie Nie,<sup>2</sup> Jing Zheng<sup>2</sup>

<sup>1</sup>Jiangsu key Laboratory of Electrochemical Energy Storage Technologies, College of Materials Science and Technologies, Nanjing University of Aeronautics and Astronautics, Nanjing 210016, P. R. China

<sup>2</sup>Department of Chemistry and Materials Science, College of Science, Nanjing Forestry University, Nanjing 210037, P. R. China

\*Corresponding authors: laiqingxue@126.com (Q. Lai);

#### List and contents

**Figure S1.** TEM image of FeNC@PM Under a wide field of view.

**Figure S2.** XPS survey spectra of prepared Fe-N-C materials.

**Figure S3.** CV curves of prepared Fe-N-C materials with the 30% Pt/C for reference in the O<sub>2</sub>-saturated electrolyte.

**Figure S4.** LSV curves of FeNC@PM materials obtained at different pyrolysis temperatures.

**Figure S5.** H<sub>2</sub>O<sub>2</sub> yield of prepared Fe-N-C materials with the 30% Pt/C for reference

**Figure S6.** linear fit of capacitive  $\Delta J/2$  vs. scan rates for FeNC@PM materials obtained at different pyrolysis temperatures.

**Figure S7.** Comparison of the linear fit of capacitive  $\Delta J/2$  vs. scan rates for FeNC@PM materials obtained at 950°C before and after ADT.

**Table S1.** Contents of different elements in FeNC@PM, FeNC@P, FeNC@M and FeNC from XPS spectra.

**Table S2.** The content of the different N configuration in the high-resolution N 1s XPS spectra for FeNC@PM, FeNC@P, FeNC@M and FeNC.

**Table S3.** The content of the different typed carbon structure from Raman spectra

**Table S4.** ORR activity comparison of previously reported Fe-N-C catalysts with this work in acidic media.

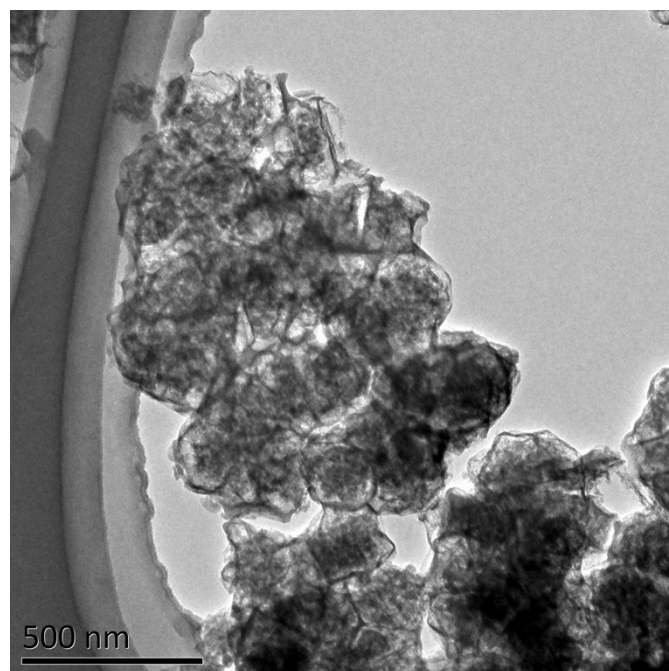

**Figure S1.** TEM image of FeNC@PM Under a wide field of view.

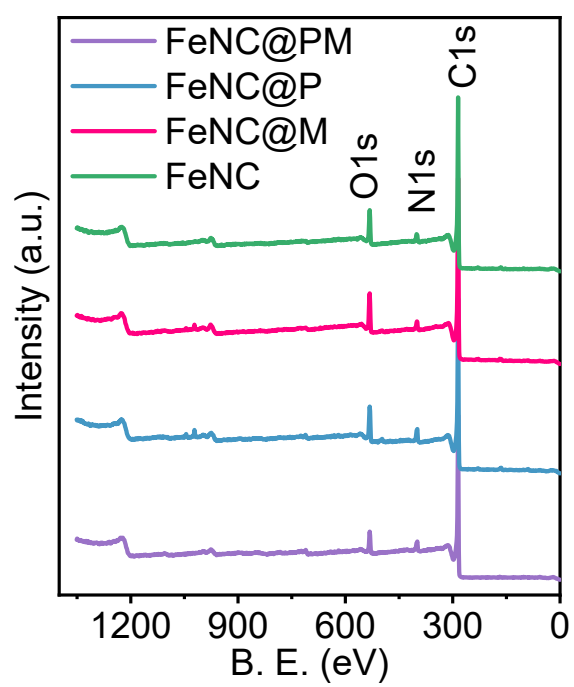

**Figure S2.** XPS survey spectra of prepared Fe-N-C materials.

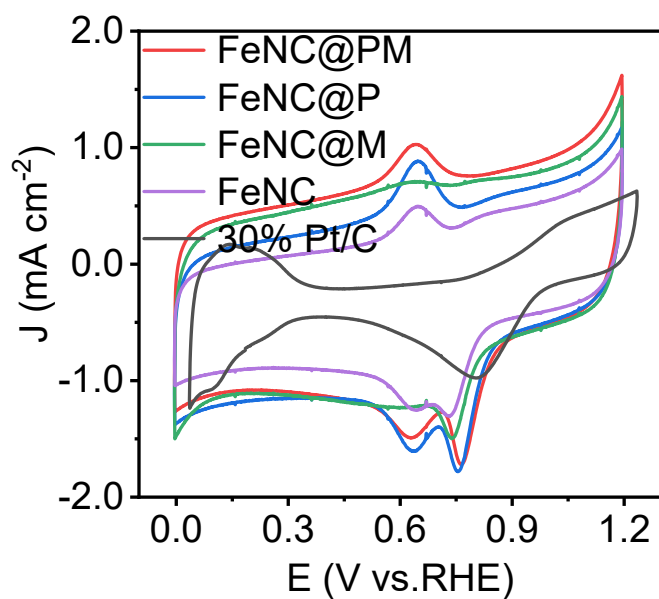

**Figure S3.** CV curves of prepared Fe-N-C materials with the 30% Pt/C for reference in the O<sub>2</sub>-saturated electrolyte.

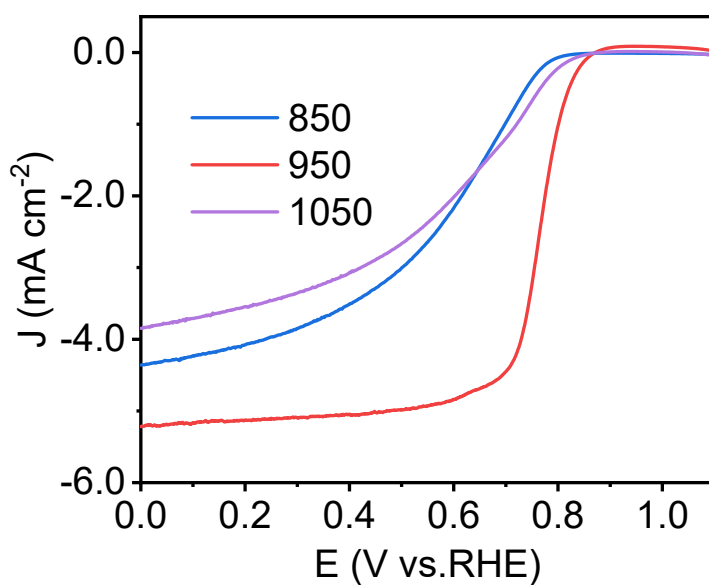

**Figure S4.** LSV curves of FeNC@PM materials obtained at different pyrolysis temperatures.

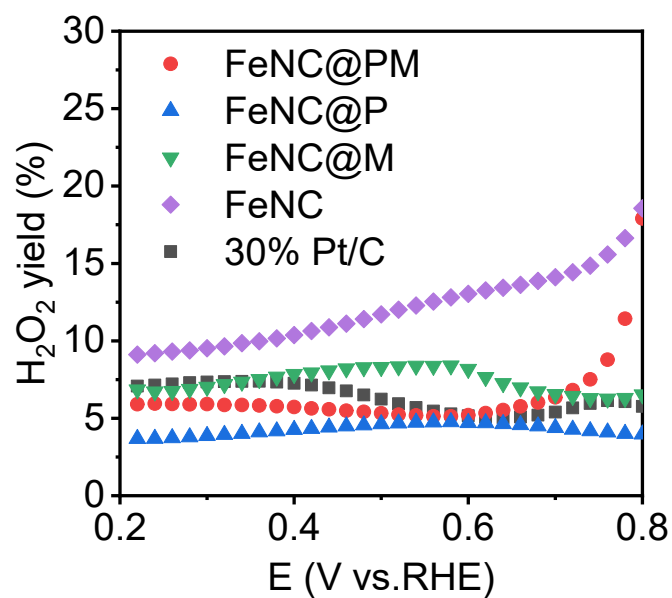

**Figure S5.** H<sub>2</sub>O<sub>2</sub> yield of prepared Fe-N-C materials with the 30% Pt/C for reference

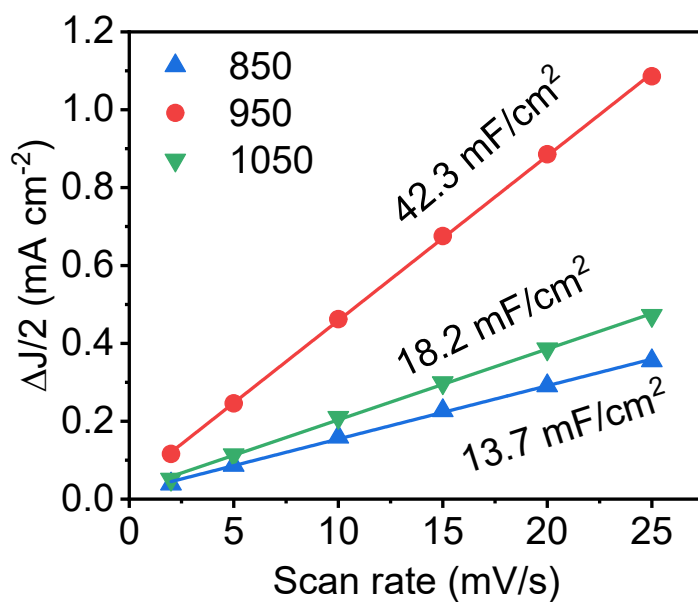

**Figure S6.** linear fit of capacitive  $\Delta J/2$  vs. scan rates for FeNC@PM materials obtained at different pyrolysis temperatures.

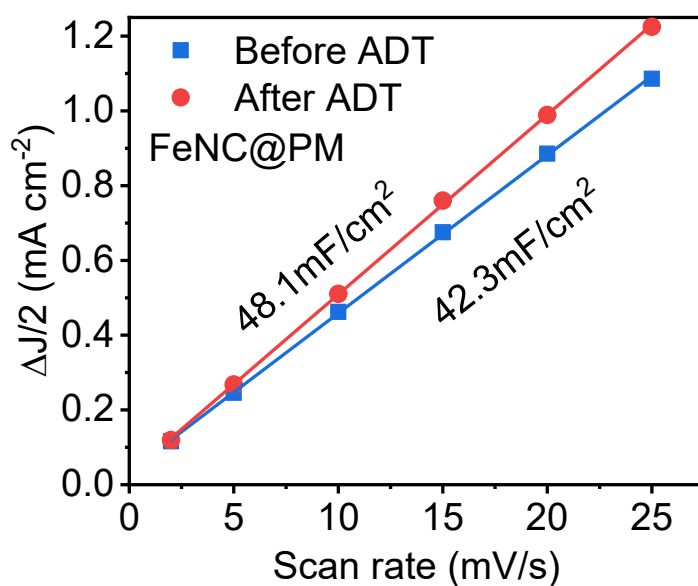

**Figure S7.** Comparison of the linear fit of capacitive  $\Delta J/2$  vs. scan rates for FeNC@PM materials obtained at 950°C before and after ADT.

**Table S1.** Contents of different elements in FeNC@PM, FeNC@P, FeNC@M and FeNC from XPS spectra.

| Sample  | C (at.%) | N (at.%) | O (at.%) | Fe (at.%) | Zn (at.%) |
|---------|----------|----------|----------|-----------|-----------|
| FeNC@PM | 86.62    | 5.89     | 6.46     | 1.02      | -         |
| FeNC@P  | 79.73    | 6.15     | 9.12     | 0.44      | 5.56      |
| FeNC@M  | 84.60    | 4.48     | 10.15    | 0.45      | 0.33      |
| FeNC    | 85.49    | 4.17     | 9.76     | 0.58      | -         |

**Table S2.** The content of the different N configuration in the high-resolution N 1s XPS spectra for FeNC@PM, FeNC@P, FeNC@M and FeNC.

| Sample  | N1(%) | N2(%) | N3(%) | N4(%) | N5(%) | N6(%) |
|---------|-------|-------|-------|-------|-------|-------|
| FeNC@PM | 16.9  | 24.5  | 7.4   | 34.1  | 11.5  | 5.6   |
| FeNC@P  | 19.3  | 23.5  | 9.7   | 24.6  | 4.4   | 18.5  |
| FeNC@M  | 10.3  | 16.9  | 24.55 | 30.1  | 6.2   | 12.0  |
| FeNC    | 14.2  | 14.1  | 18.8  | 30.8  | 7.0   | 15.1  |

**Table S3.** The content of the different typed carbon structure from Raman spectra.

| Sample  | D (%) | D" (%) | T (%) | G (%) | AD/AG |
|---------|-------|--------|-------|-------|-------|
| FeNC@PM | 21.6  | 30.0   | 36.0  | 12.4  | 7.06  |
| FeNC@P  | 44.2  | 14.4   | 15.9  | 25.5  | 2.92  |
| FeNC@M  | 44.1  | 15.0   | 21.2  | 19.7  | 4.08  |

**Table S4.** ORR activity comparison of previously reported Fe-N-C catalysts with this work in acidic media.

|    | Catalyst                         | Mass loading (mg/cm <sup>2</sup> ) | E <sub>1/2</sub> (V vs. RHE) | J <sub>L</sub> (mA/cm <sup>2</sup> ) @1600 rpm | n     | Ref.                                                       |
|----|----------------------------------|------------------------------------|------------------------------|------------------------------------------------|-------|------------------------------------------------------------|
| 1  | pyrolyzed Fe-N-C                 | 0.60                               | ~0.755                       | 3.64 (900 rpm)                                 | ~3.95 | <i>ACS Catal.</i> , 2014, 4, 3928–3936                     |
| 2  | CNT/PC (with Fe-N <sub>x</sub> ) | 0.60                               | 0.79                         | 6.0                                            | --    | <i>J. Am. Chem. Soc.</i> , 2016, 138, 15046-5056           |
| 3  | Fe-CB@PAN-1000                   | 0.80                               | 0.758                        | 4.68 (900 rpm)                                 | 3.9   | <i>J. Colloid Interface Sci.</i> , 2017,502, 44-51         |
| 4  | (Fe,Co)/N-C                      | 1.095                              | 0.863                        | ~6.0                                           | ~4.0  | <i>J. Am. Chem. Soc.</i> , 2017, 139, 17281-7284           |
| 5  | Fe/SNC                           | 0.61                               | 0.77                         | 4.8                                            | 3.9   | <i>Angew. Chem. Int. Ed.</i> , 2017, 56, 13800-13804       |
| 6  | Fe-N-C                           | 0.24                               | 0.657                        | 4.5                                            | 3.99  | <i>Int. J. Hydrogen Energy</i> , 2019, 44, 27379-27389     |
| 7  | P-FeMOF@ZIF-8                    | 0.255                              | 0.73                         | ~5.3                                           | ~3.85 | <i>ACS Appl. Mater. Interfaces</i> , 2019, 11, 35755–35763 |
| 8  | Fe-C-N950                        | ~1.0                               | 0.80                         | ~4.0                                           | ~4    | <i>J. Am. Chem. Soc.</i> , 2020, 142, 12, 5477-5481        |
| 9  | FeNi0.25-NC                      | 0.60                               | 0.79                         | 5.6                                            | ~3.99 | <i>Appl. Surf. Sci.</i> , 2021, 538, 148017                |
| 10 | 0.14Co0.01Fe-CB                  | 0.613                              | 0.76                         | ~5.3                                           | 3.99  | <i>Appl. Catal. B Environ.</i> , 2021, 299, 120656         |
| 11 | F-FeNC-2                         | 0.60                               | 0.83                         | ~3.7 (900 rpm)                                 | 3.98  | <i>Mater. Horiz.</i> , 2022, 9, 417-424                    |
| 12 | Fe/Bi-RNC                        | ~0.51                              | 0.76                         | 5.8                                            | 3.89  | <i>J. Mater. Chem. A</i> , 2022,10, 664-671                |
| 13 | Fe-N-C-CeO <sub>2</sub>          | 0.60                               | 0.80                         | ~6.0                                           | 3.95  | <i>Adv. Mater. Interfaces</i> , 2022, 9, 2200852           |
| 14 | Fe@MNC-OAc                       | 0.80                               | 0.838                        | 4.5 (900 rpm)                                  | 3.99  | <i>Appl. Catal. B Environ.</i> , 2023, 324, 122209         |
| 15 | Fe@G-800/100                     | 0.294                              | 0.70                         | ~4.0                                           | 3.68  | <i>ACS Sustain. Chem. Eng.</i> , 2023, 11, 21,             |

|    |         |      |      |      |      |           |
|----|---------|------|------|------|------|-----------|
|    |         |      |      |      |      | 8131–8139 |
| 16 | FeNC@PM | 0.50 | 0.78 | 5.12 | 3.90 | This work |
